# Supplementary material for: Effects of Exogenous Isosteviol on the Physiological Characteristics of Brassica napus Seedlings under Salt Stress
Source: MDPI journal article supplement (doi:10.3390/plants13020217), 2024-01-12
Supplement: s1 [file s1]

## Supplementary Materials

**Table S1.** Effect of isosteviol on the biomass of *Brassica napus* seedlings under salt stress.

| Treatment | Shoot                                 |                                      | Root                                  |                                      |
|-----------|---------------------------------------|--------------------------------------|---------------------------------------|--------------------------------------|
|           | Fresh Weight (g plant <sup>-1</sup> ) | Dry Weight (mg plant <sup>-1</sup> ) | Fresh Weight (g plant <sup>-1</sup> ) | Dry Weight (mg plant <sup>-1</sup> ) |
| T1        | 0.40 ± 0.03 a                         | 21.72 ± 0.51 a                       | 0.30 ± 0.02 a                         | 17.41 ± 0.31 a                       |
| T2        | 0.12 ± 0.02 d                         | 8.21 ± 0.39 d                        | 0.08 ± 0.03 d                         | 5.90 ± 0.22 d                        |
| T3        | 0.18 ± 0.02 c                         | 11.32 ± 0.31 c                       | 0.12 ± 0.03 c                         | 7.62 ± 0.23 c                        |
| T4        | 0.24 ± 0.02 b                         | 14.20 ± 0.62 b                       | 0.16 ± 0.01 b                         | 9.53 ± 0.42 bc                       |
| T5        | 0.23 ± 0.01 b                         | 14.11 ± 0.48 b                       | 0.17 ± 0.03 b                         | 10.21 ± 0.41 b                       |
| T6        | 0.19 ± 0.02 c                         | 10.63 ± 0.32 c                       | 0.12 ± 0.01 c                         | 8.59 ± 0.21 b                        |
| T7        | 0.20 ± 0.03 bc                        | 10.92 ± 0.30 c                       | 0.14 ± 0.03 bc                        | 8.93 ± 0.29 bc                       |

T1: control group; T2: NaCl; T3: NaCl + isosteviol (10<sup>-10</sup>); T4: NaCl + isosteviol (10<sup>-9</sup>); T5: NaCl + isosteviol (10<sup>-8</sup>); T6: NaCl + isosteviol (10<sup>-7</sup>); T7: NaCl + isosteviol (10<sup>-6</sup>). Data are presented as the mean ± S.D. (*n* = 5 in each group). Mean values with the same letter presented in the column represent the absence of significant difference (*p* ≤ 0.05).

**Table S2.** Effects of isosteviol on the osmotic substance contents in the tissues of *Brassica napus* seedlings under salt stress.

| Treatment | Shoot                                   |                                 |                                         | Root                                    |                                 |                                         |
|-----------|-----------------------------------------|---------------------------------|-----------------------------------------|-----------------------------------------|---------------------------------|-----------------------------------------|
|           | Glycine Betaine (μg g <sup>-1</sup> FW) | Proline (μg g <sup>-1</sup> FW) | Soluble Protein (mg g <sup>-1</sup> FW) | Glycine Betaine (μg g <sup>-1</sup> FW) | Proline (μg g <sup>-1</sup> FW) | Soluble Protein (mg g <sup>-1</sup> FW) |
| T1        | 19.7 ± 0.9 b                            | 169.3 ± 4.7 d                   | 15.8 ± 1.7 d                            | 15.6 ± 0.7 e                            | 299.3 ± 8.9 d                   | 18.8 ± 1.1 e                            |
| T2        | 22.9 ± 1.4 a                            | 257.8 ± 7.1 a                   | 22.0 ± 1.1 c                            | 31.9 ± 1.1 a                            | 357.8 ± 7.4 a                   | 42.0 ± 2.3 d                            |
| T3        | 22.6 ± 0.7 a                            | 238.5 ± 8.8 bc                  | 23.7 ± 0.8 b                            | 26.5 ± 0.8 bc                           | 338.5 ± 6.7 b                   | 45.8 ± 1.8 c                            |
| T4        | 20.5 ± 1.3 b                            | 232.4 ± 7.9 c                   | 25.7 ± 1.9 a                            | 23.5 ± 0.9 d                            | 330.2 ± 9.3 bc                  | 55.6 ± 2.5 a                            |
| T5        | 21.9 ± 1.5 a                            | 228.9 ± 4.4 c                   | 23.6 ± 1.3 b                            | 25.8 ± 1.4 c                            | 328.7 ± 5.5 c                   | 51.5 ± 1.8 b                            |
| T6        | 21.0 ± 0.6 ab                           | 231.5 ± 7.5 c                   | 22.5 ± 1.5 bc                           | 28.3 ± 1.5 b                            | 331.5 ± 7.6 bc                  | 52.5 ± 2.4 b                            |
| T7        | 21.2 ± 0.8 ab                           | 242.4 ± 4.6 b                   | 22.2 ± 0.9 bc                           | 27.3 ± 0.6 b                            | 330.4 ± 5.8 bc                  | 52.1 ± 1.5 b                            |

T1: control group; T2: NaCl; T3: NaCl + isosteviol (10<sup>-10</sup>); T4: NaCl + isosteviol (10<sup>-9</sup>); T5: NaCl + isosteviol (10<sup>-8</sup>); T6: NaCl + isosteviol (10<sup>-7</sup>); T7: NaCl + isosteviol (10<sup>-6</sup>); FW: fresh weight. Data are presented as the mean ± S.D. (*n* = 5 in each group). Mean values with the same letter presented in the column represent the absence of significant difference (*p* ≤ 0.05).

**Table S3.** Effect of exogenous isosteviol on the reactive oxygen species (ROS) content of *Brassica napus* seedlings under salt stress.

| Treatment | Shoot                                                   |                                                       | Root                                                    |                                                       |
|-----------|---------------------------------------------------------|-------------------------------------------------------|---------------------------------------------------------|-------------------------------------------------------|
|           | H <sub>2</sub> O <sub>2</sub> (nmol g <sup>-1</sup> FW) | O <sub>2</sub> <sup>-</sup> (nmol g <sup>-1</sup> FW) | H <sub>2</sub> O <sub>2</sub> (nmol g <sup>-1</sup> FW) | O <sub>2</sub> <sup>-</sup> (nmol g <sup>-1</sup> FW) |
| T1        | 36.9 ± 2.7 f                                            | 4.4 ± 0.7 d                                           | 38.9 ± 2.1 f                                            | 3.7 ± 0.4 e                                           |
| T2        | 224.8 ± 11.1 a                                          | 18.2 ± 1.1 a                                          | 426.4 ± 12.3 a                                          | 15.2 ± 1.3 a                                          |
| T3        | 216.1 ± 10.8 a                                          | 12.3 ± 0.8 bc                                         | 312.3 ± 11.8 b                                          | 13.3 ± 0.8 b                                          |
| T4        | 172.8 ± 8.9 c                                           | 10.5 ± 0.9 c                                          | 272.8 ± 13.5 d                                          | 13.5 ± 0.5 b                                          |
| T5        | 191.8 ± 7.3 b                                           | 12.4 ± 1.3 bc                                         | 291.8 ± 14.8 c                                          | 12.4 ± 1.1 bc                                         |
| T6        | 95.2 ± 5.5 e                                            | 13.5 ± 0.7 b                                          | 273.2 ± 12.4 d                                          | 9.6 ± 0.6 d                                           |
| T7        | 150.0 ± 6.9 d                                           | 10.9 ± 0.9 c                                          | 252.3 ± 9.5 e                                           | 11.4 ± 0.8 c                                          |

T1: control group; T2: NaCl; T3: NaCl + isosteviol (10<sup>-10</sup>); T4: NaCl + isosteviol (10<sup>-9</sup>); T5: NaCl + isosteviol (10<sup>-8</sup>); T6: NaCl + isosteviol (10<sup>-7</sup>); T7: NaCl + isosteviol (10<sup>-6</sup>); FW: fresh weight. Data are presented as the mean ± S.D. (*n* = 5 in each group). Mean values with the same letter presented in the column represent the absence of significant difference (*p* ≤ 0.05).
